# Supplementary material for: Interpenetration of CH3NH3PbI3 and TiO2 improves perovskite solar cells while TiO2 expansion leads to degradation
Source: Royal Society of Chemistry journal article supplement (doi:10.1039/c7cp03116e), 2017-01-01
Supplement: c7cp03116e1.pdf [file c7cp03116e1.pdf]

## Interpenetration of $\text{CH}_3\text{NH}_3\text{PbI}_3$ and $\text{TiO}_2$ Improves Perovskite Solar Cells while $\text{TiO}_2$ Expansion Leads to Degradation

W. C. Lin,<sup>ab</sup> A. Kovalsky,<sup>b</sup> Y. C. Wang,<sup>c</sup> L. L. Wang,<sup>b</sup> S. Goldberg,<sup>b</sup> W. L. Gao,<sup>c</sup> C. Y. Wu,<sup>c</sup> H. Y. Chang,<sup>c</sup> J. J. Shyue,<sup>\*c</sup> C. Burda,<sup>\*ab</sup>

<sup>a</sup> Department of Macromolecular Science and Engineering, Case Western Reserve University, Cleveland, OH 44106, USA.

<sup>b</sup> Department of Chemistry, Case Western Reserve University, Cleveland, OH 44106, USA. Email: cxb77@case.edu

<sup>c</sup> Research Center for Applied Sciences, Academia Sinica, Taipei 115, Taiwan. Email: shyue@gate.sinica.edu.tw.

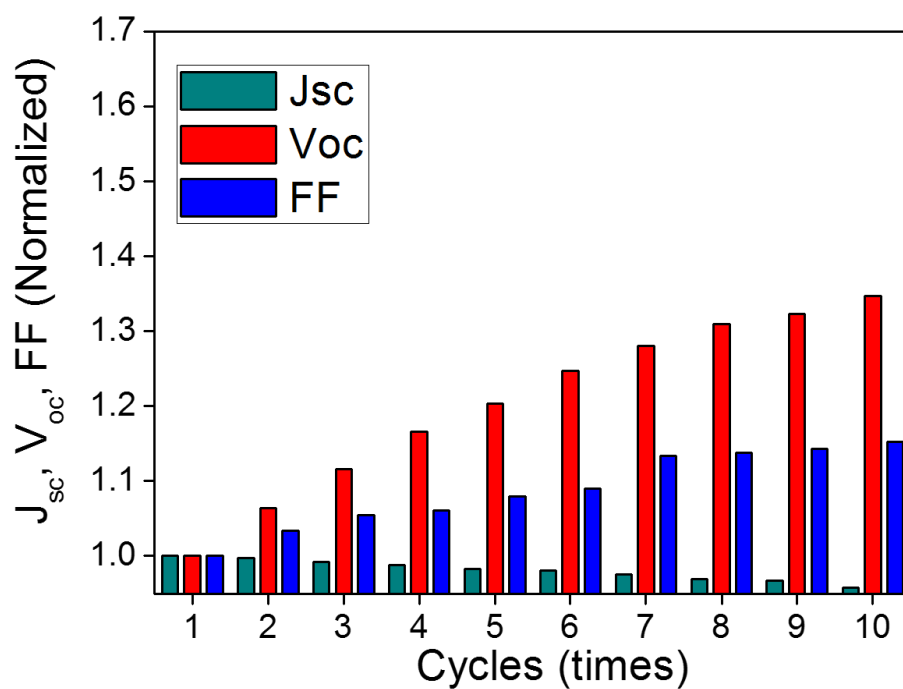

Figure S1. The evolution of normalized performance parameters ( $J_{sc}$ ,  $V_{oc}$ , FF, with respect to initial value) with varying number of voltage sweeps.

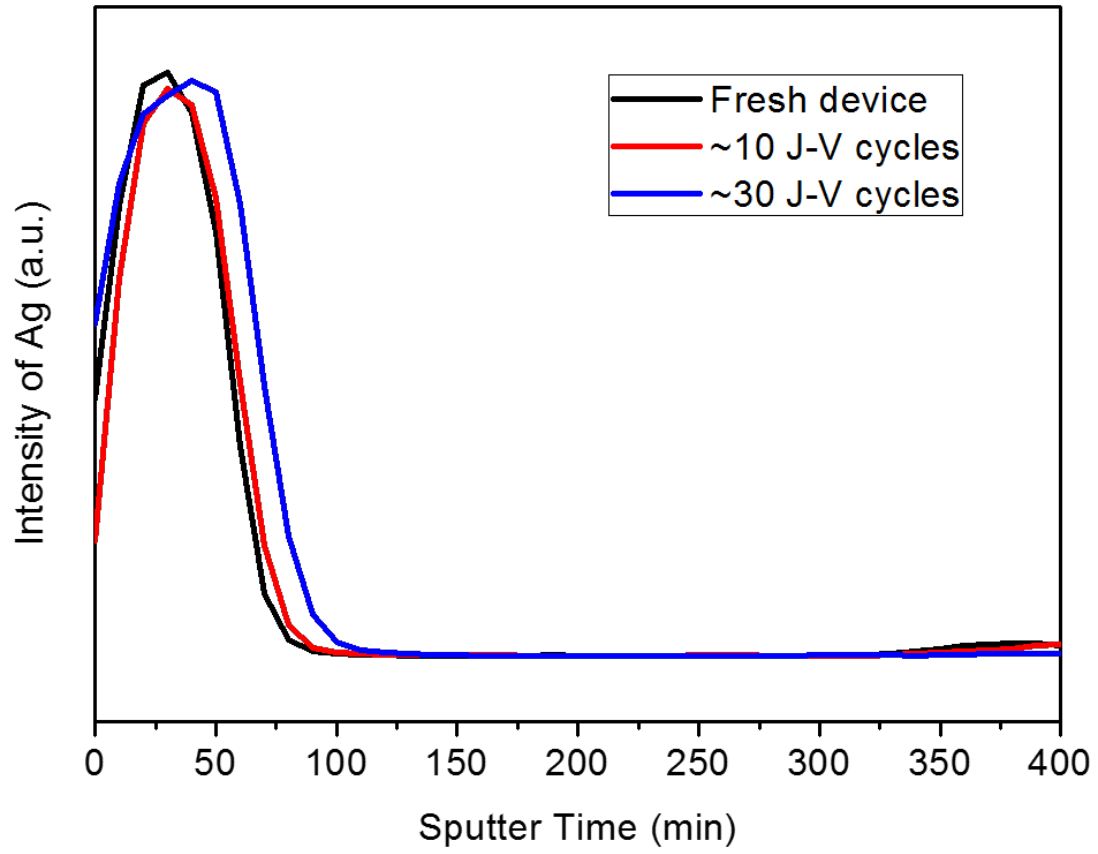

Figure S2. Ag depth profiles extracted from devices with different stage of PV operation.
